# Supplementary material for: Debye Temperature Evaluation for Secondary Battery Cathode of α-SnxFe1−xOOH Nanoparticles Derived from the 57Fe- and 119Sn-Mössbauer Spectra
Source: MDPI journal article supplement (doi:10.3390/ijms25052488), 2024-02-20
Supplement: s1 [file s1]

## Supplementary Information

# Debye Temperature Evaluation for Secondary Battery Cathode of $\alpha\text{-Sn}_x\text{Fe}_{1-x}\text{OOH}$ Nanoparticles Derived from the $^{57}\text{Fe}$ - and $^{119}\text{Sn}$ -Mössbauer Spectra

Ahmed Ibrahim <sup>1</sup>, Kaoru Tani <sup>1</sup>, Kanae Hashi <sup>1</sup>, Bofan Zhang <sup>1</sup>, Zoltán Homonnay <sup>2</sup>, Ernő Kuzmann <sup>2</sup>, Arijeta Bafti <sup>3</sup>, Luka Pavić <sup>4</sup>, Stjepko Krehula <sup>4</sup>, Marijan Marčiuš <sup>4</sup> and Shiro Kubuki <sup>1,\*</sup>

<sup>1</sup> Department of Chemistry, Graduate School of Science, Tokyo Metropolitan University, Tokyo 192-0397, Japan

<sup>2</sup> Institute of Chemistry, Eötvös Loránd University, 1117 Budapest, Hungary

<sup>3</sup> Faculty of Chemical Engineering and Technology, University of Zagreb, 10000 Zagreb, Croatia

<sup>4</sup> Division of Materials Chemistry, Ruđer Bošković Institute, 10000 Zagreb, Croatia

\*Correspondence: [kubuki@tmu.ac.jp](mailto:kubuki@tmu.ac.jp)

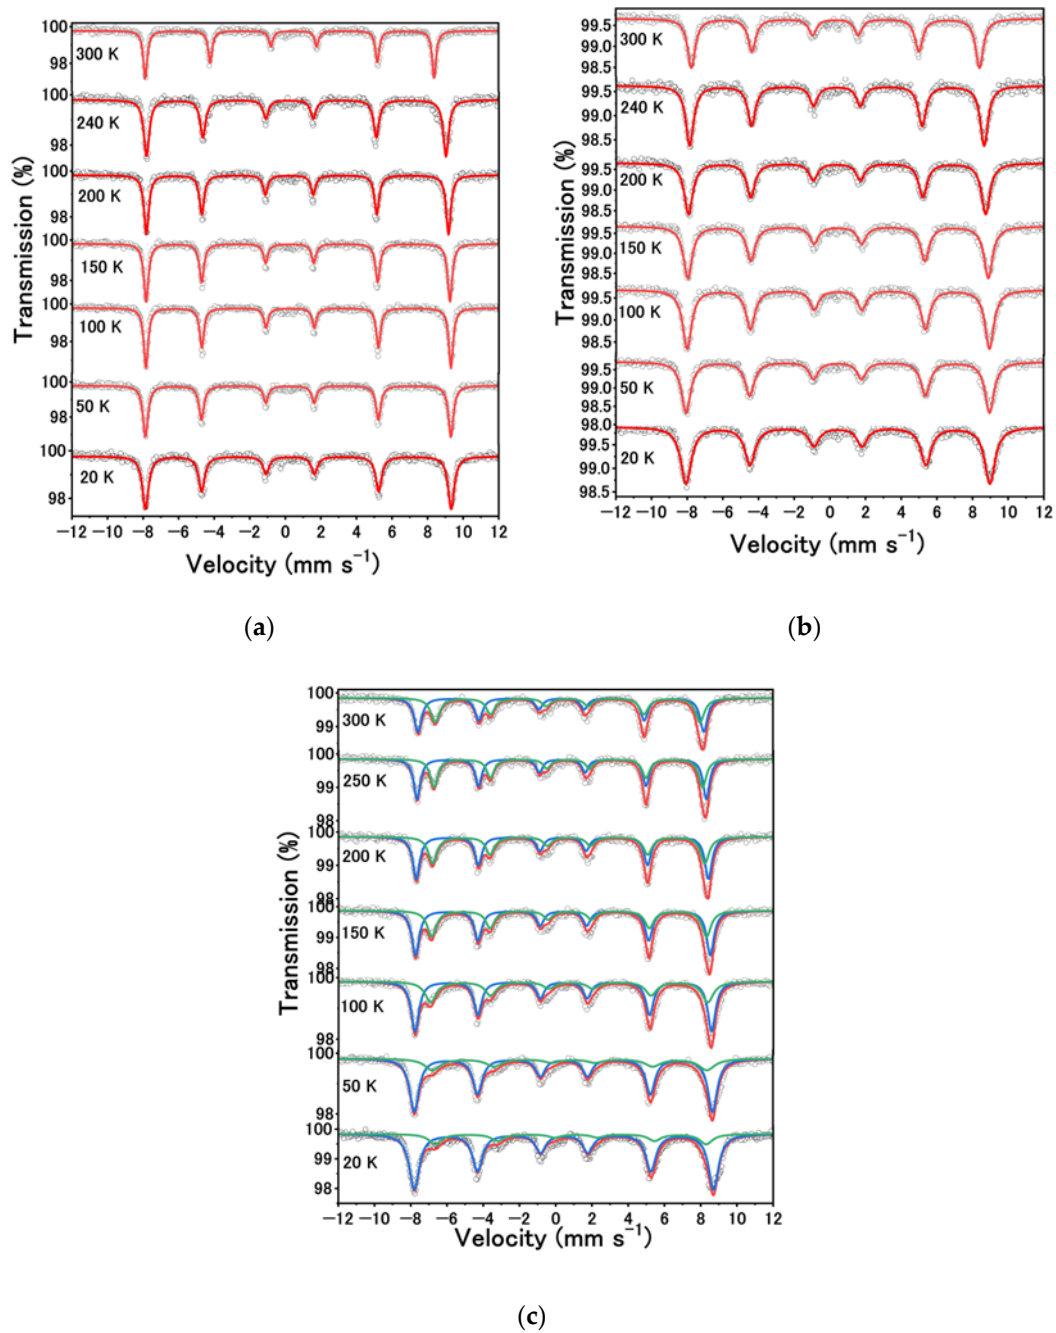

**Figure S1.**  $^{57}\text{Fe}$ -Mössbauer spectra of  $\alpha\text{-Fe}_2\text{O}_3$  (a),  $\gamma\text{-Fe}_2\text{O}_3$  (b), and  $\text{Fe}_3\text{O}_4$  (c) measured at 300, 250, 200, 150, 100, 50, 20 K.

**Table S1.**  $^{57}\text{Fe}$ -Mössbauer parameters of  $\alpha\text{-Fe}_2\text{O}_3$  recorded from 300 to 20 K.

| $T$ (K) | $\delta$ (mm s $^{-1}$ ) | $\Delta$ (mm s $^{-1}$ ) | $H_{\text{int}}$ (T) | $\Gamma$ (mm s $^{-1}$ ) |
|---------|--------------------------|--------------------------|----------------------|--------------------------|
| 300     | 0.368 $\pm$ 0.01         | −0.227 $\pm$ 0.01        | 50.50 $\pm$ 0.01     | 0.269 $\pm$ 0.01         |
| 260     | 0.399 $\pm$ 0.01         | −0.179 $\pm$ 0.01        | 51.11 $\pm$ 0.02     | 0.312 $\pm$ 0.01         |
| 240     | 0.414 $\pm$ 0.01         | 0.376 $\pm$ 0.01         | 52.37 $\pm$ 0.01     | 0.372 $\pm$ 0.01         |
| 220     | 0.425 $\pm$ 0.01         | 0.441 $\pm$ 0.01         | 52.62 $\pm$ 0.01     | 0.311 $\pm$ 0.01         |
| 200     | 0.440 $\pm$ 0.01         | 0.459 $\pm$ 0.01         | 52.84 $\pm$ 0.01     | 0.321 $\pm$ 0.01         |
| 150     | 0.468 $\pm$ 0.01         | 0.469 $\pm$ 0.01         | 53.13 $\pm$ 0.01     | 0.313 $\pm$ 0.01         |
| 100     | 0.492 $\pm$ 0.01         | 0.467 $\pm$ 0.01         | 53.33 $\pm$ 0.01     | 0.297 $\pm$ 0.01         |
| 50      | 0.499 $\pm$ 0.01         | 0.465 $\pm$ 0.01         | 53.42 $\pm$ 0.01     | 0.339 $\pm$ 0.01         |
| 20      | 0.503 $\pm$ 0.01         | 0.458 $\pm$ 0.01         | 53.45 $\pm$ 0.02     | 0.415 $\pm$ 0.01         |

$\delta$ : isomer shift,  $\Delta$ : quadrupole splitting,  $H_{\text{int}}$ : internal magnetic field,  $\Gamma$ : full width at half maximum.

**Table S2.**  $^{57}\text{Fe}$ -Mössbauer parameters of  $\gamma\text{-Fe}_2\text{O}_3$  recorded from 300 to 20 K.

| $T$ (K) | $\delta$ (mm s $^{-1}$ ) | $\Delta$ (mm s $^{-1}$ ) | $H_{\text{int}}$ (T) | $\Gamma$ (mm s $^{-1}$ ) |
|---------|--------------------------|--------------------------|----------------------|--------------------------|
| 300     | 0.319 $\pm$ 0.01         | 0.003 $\pm$ 0.007        | 50.24 $\pm$ 0.03     | 0.52 $\pm$ 0.01          |
| 280     | 0.333 $\pm$ 0.01         | 0.015 $\pm$ 0.007        | 50.67 $\pm$ 0.02     | 0.53 $\pm$ 0.01          |
| 260     | 0.344 $\pm$ 0.01         | 0.012 $\pm$ 0.007        | 51.04 $\pm$ 0.03     | 0.56 $\pm$ 0.01          |
| 240     | 0.383 $\pm$ 0.01         | 0.004 $\pm$ 0.007        | 51.34 $\pm$ 0.03     | 0.53 $\pm$ 0.01          |
| 220     | 0.377 $\pm$ 0.01         | 0.004 $\pm$ 0.008        | 51.62 $\pm$ 0.03     | 0.57 $\pm$ 0.01          |
| 200     | 0.386 $\pm$ 0.01         | 0.016 $\pm$ 0.007        | 51.82 $\pm$ 0.02     | 0.58 $\pm$ 0.01          |
| 150     | 0.441 $\pm$ 0.01         | 0.014 $\pm$ 0.007        | 52.39 $\pm$ 0.02     | 0.60 $\pm$ 0.01          |
| 100     | 0.451 $\pm$ 0.01         | 0.019 $\pm$ 0.007        | 52.71 $\pm$ 0.02     | 0.61 $\pm$ 0.01          |
| 50      | 0.444 $\pm$ 0.01         | 0.016 $\pm$ 0.006        | 52.92 $\pm$ 0.02     | 0.63 $\pm$ 0.01          |
| 20      | 0.453 $\pm$ 0.01         | −0.000 $\pm$ 0.009       | 52.95 $\pm$ 0.03     | 0.71 $\pm$ 0.01          |

$\delta$ : isomer shift,  $\Delta$ : quadrupole splitting,  $H_{\text{int}}$ : internal magnetic field,  $\Gamma$ : full width at half maximum.

**Table S3.**  $^{57}\text{Fe}$ -Mössbauer parameters of  $\text{Fe}_3\text{O}_4$  recorded from 300 to 20 K.

| $T$ (K) | $A$ (%) | $\delta$ (mm s $^{-1}$ ) | $\Delta$ (mm s $^{-1}$ ) | $H_{\text{int}}$ (T) | $\Gamma$ (mm s $^{-1}$ ) |
|---------|---------|--------------------------|--------------------------|----------------------|--------------------------|
| 300     | 53.8    | 0.311 $\pm$ 0.01         | −0.038 $\pm$ 0.01        | 49.02 $\pm$ 0.04     | 0.73 $\pm$ 0.02          |
|         | 46.2    | 0.655 $\pm$ 0.01         | 0.02 $\pm$ 0.02          | 45.43 $\pm$ 0.06     | 0.71 $\pm$ 0.03          |
| 250     | 55.2    | 0.334 $\pm$ 0.01         | −0.032 $\pm$ 0.01        | 49.62 $\pm$ 0.03     | 0.44 $\pm$ 0.01          |
|         | 44.8    | 0.678 $\pm$ 0.01         | 0.01 $\pm$ 0.01          | 46.09 $\pm$ 0.04     | 0.50 $\pm$ 0.02          |
| 200     | 56.4    | 0.372 $\pm$ 0.01         | −0.034 $\pm$ 0.01        | 50.12 $\pm$ 0.03     | 0.47 $\pm$ 0.01          |
|         | 41.3    | 0.744 $\pm$ 0.01         | −0.03 $\pm$ 0.01         | 47.16 $\pm$ 0.05     | 0.60 $\pm$ 0.02          |
| 150     | 58.7    | 0.399 $\pm$ 0.01         | −0.028 $\pm$ 0.01        | 50.56 $\pm$ 0.02     | 0.49 $\pm$ 0.01          |
|         | 41.3    | 0.744 $\pm$ 0.01         | −0.03 $\pm$ 0.01         | 47.16 $\pm$ 0.05     | 0.60 $\pm$ 0.02          |
| 100     | 62.1    | 0.422 $\pm$ 0.01         | −0.023 $\pm$ 0.01        | 50.88 $\pm$ 0.02     | 0.52 $\pm$ 0.01          |
|         | 37.9    | 0.78 $\pm$ 0.01          | −0.09 $\pm$ 0.02         | 47.55 $\pm$ 0.07     | 0.76 $\pm$ 0.03          |
| 80      | 66.1    | 0.442 $\pm$ 0.01         | −0.032 $\pm$ 0.01        | 51.05 $\pm$ 0.02     | 0.56 $\pm$ 0.01          |
|         | 33.9    | 0.80 $\pm$ 0.01          | −0.07 $\pm$ 0.02         | 47.35 $\pm$ 0.09     | 0.83 $\pm$ 0.04          |
| 50      | 72.9    | 0.448 $\pm$ 0.01         | −0.033 $\pm$ 0.01        | 51.17 $\pm$ 0.02     | 0.62 $\pm$ 0.01          |
|         | 27.1    | 0.88 $\pm$ 0.02          | −0.20 $\pm$ 0.04         | 47.10 $\pm$ 0.20     | 1.07 $\pm$ 0.07          |
| 20      | 81      | 0.462 $\pm$ 0.01         | −0.015 $\pm$ 0.01        | 51.33 $\pm$ 0.02     | 0.66 $\pm$ 0.01          |
|         | 19      | 0.97 $\pm$ 0.02          | −0.30 $\pm$ 0.04         | 46.50 $\pm$ 0.10     | 0.84 $\pm$ 0.06          |

$A$ : absorption area  $\delta$  isomer shift,  $\Delta$ : quadrupole splitting,  $H_{\text{int}}$ : internal magnetic field,  $\Gamma$ : full width at half maximum.

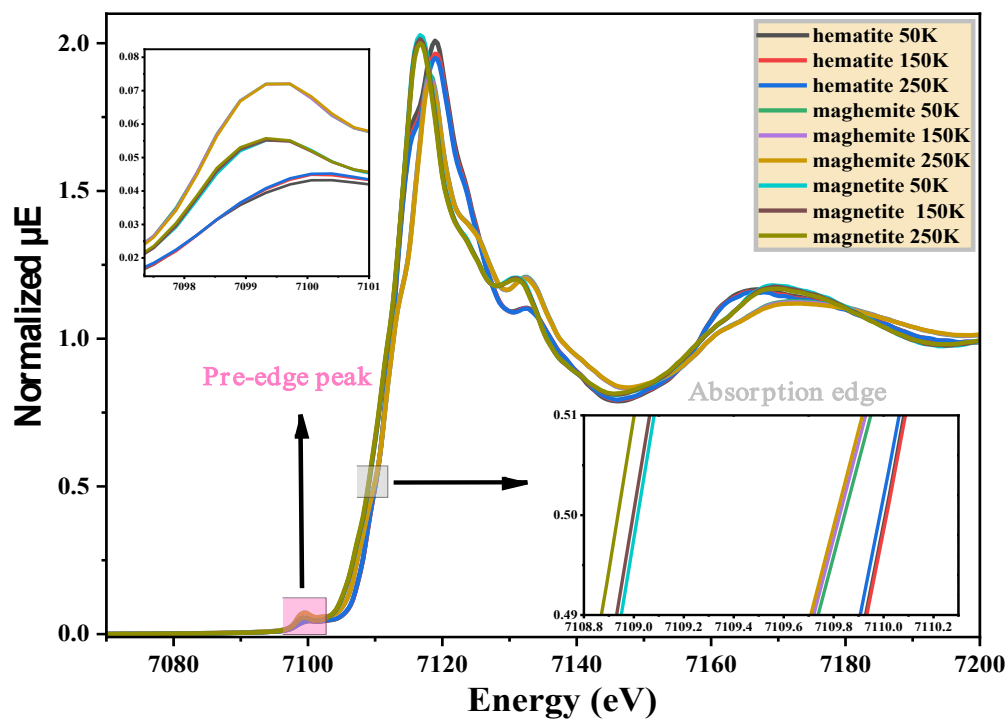

(a)

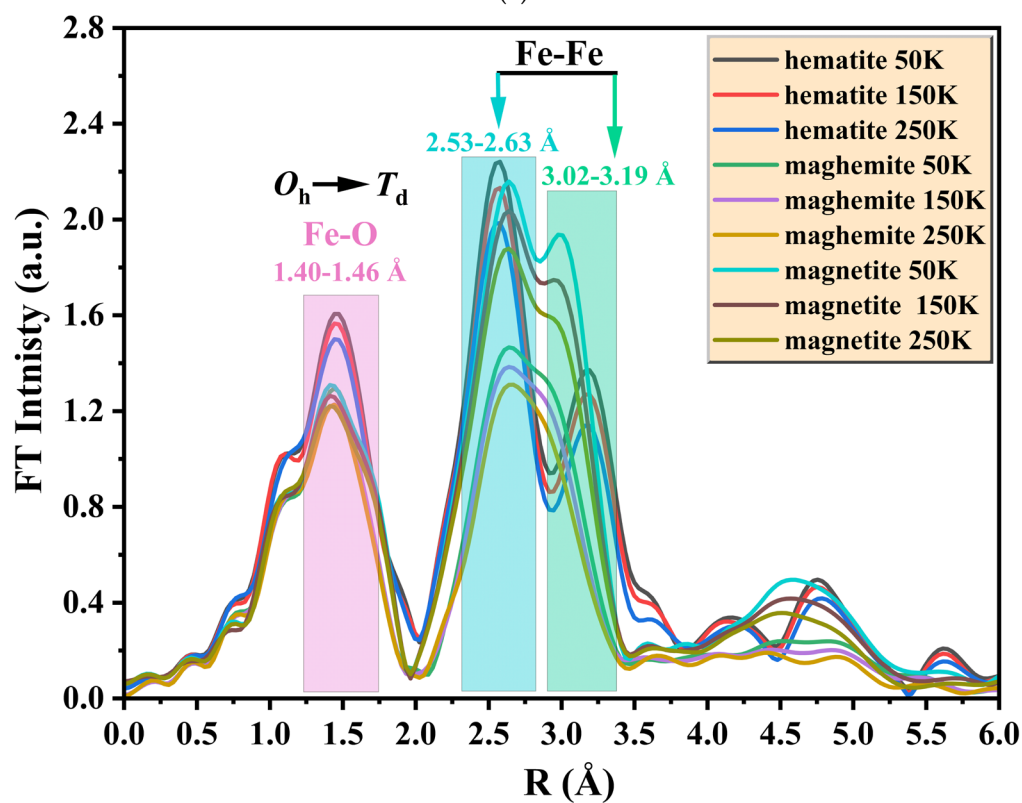

(b)

Figure S2. (a) XANES and (b) EXAFS spectra of hematite, maghemite, and magnetite measured at 50, 150, and 250 K.

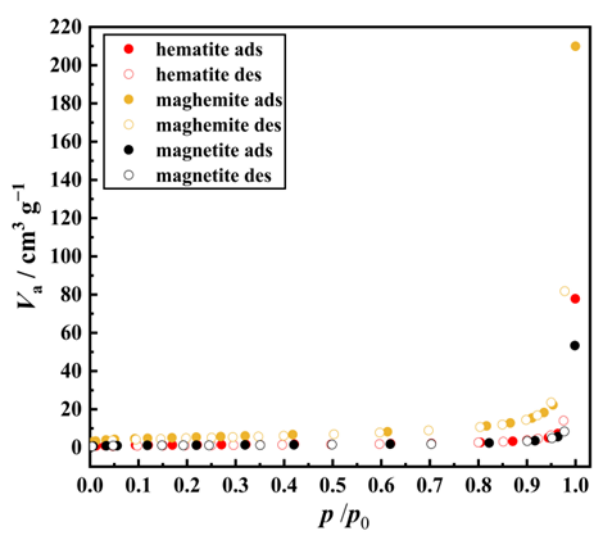

(a)

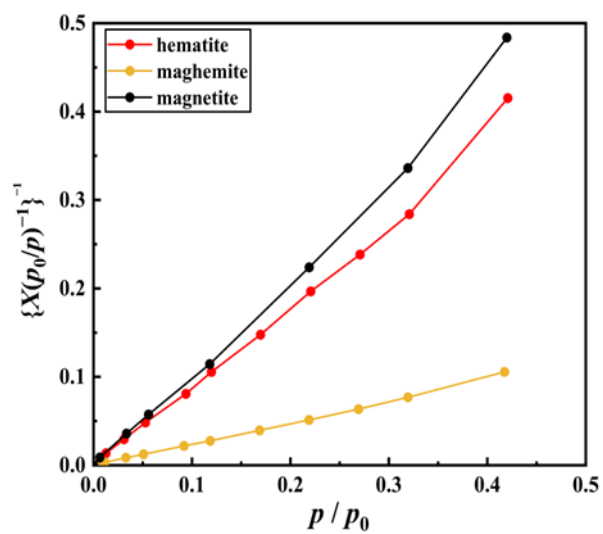

(b)

**Figure S3.** BET and  $V_a(p_0-p)$  vs.  $p/p_0$  plot of hematite, maghemite and magnetite.

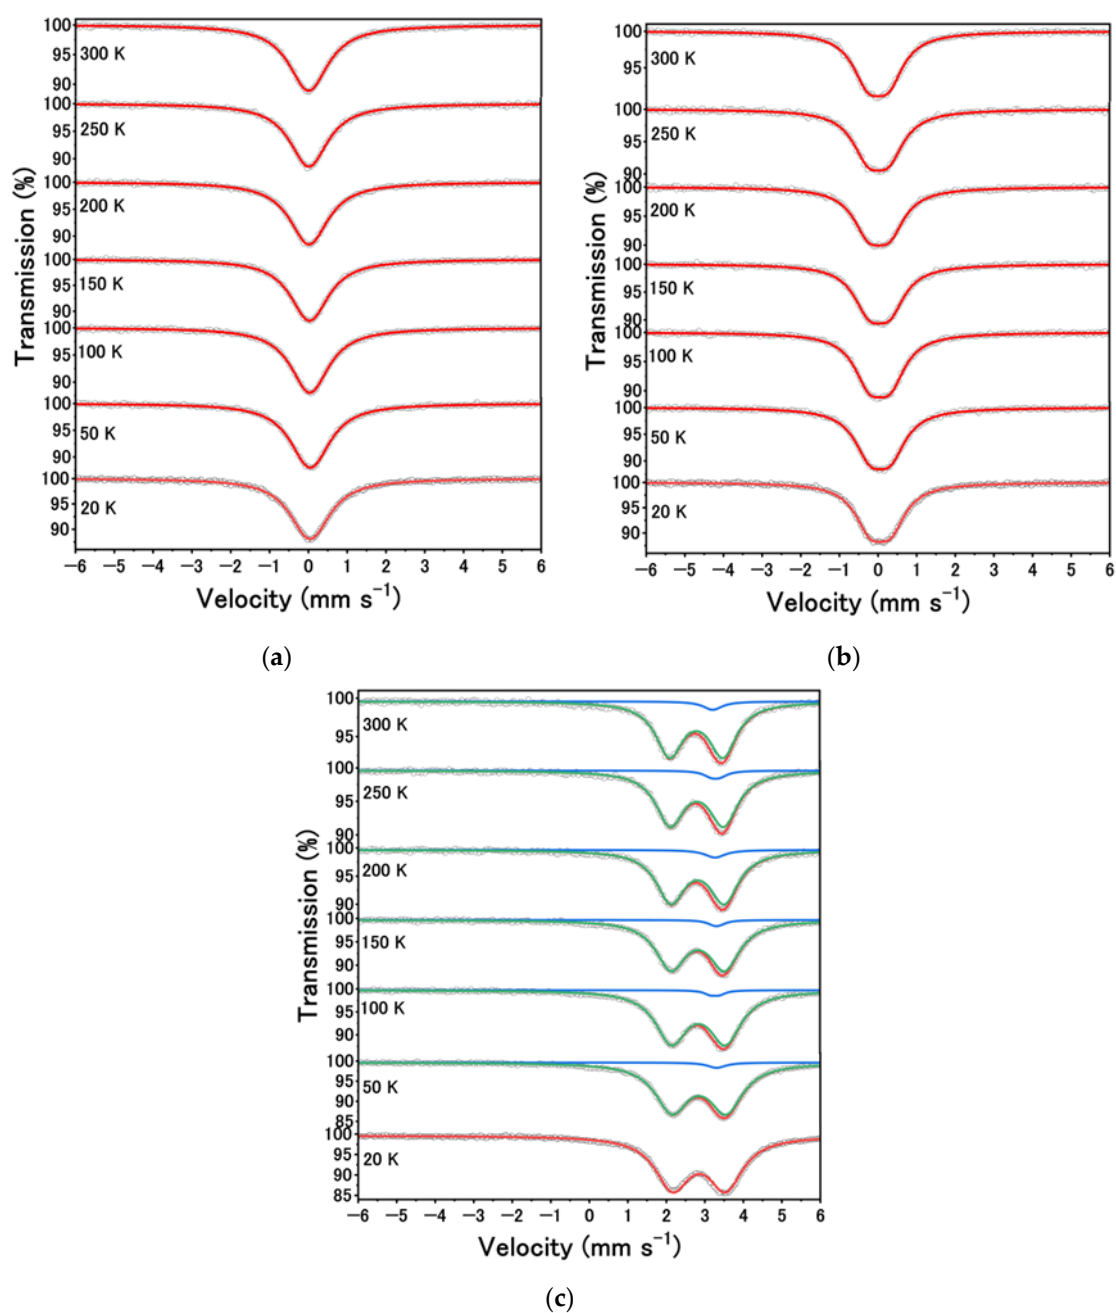

**Figure S4.**  $^{119}\text{Sn}$ -Mössbauer spectra of (a)  $\text{BaSnO}_3$ , (b)  $\text{SnO}_2$  and (c)  $\text{SnO}$  measured at 300, 250, 200, 150, 100, 50, 20 K.

**Table S4.**  $^{119}\text{Sn}$ -Mössbauer parameters of  $\text{BaSnO}_3$  recorded from 300 to 20 K.

| $T$ (K) | $A$ (%) | $\delta$ (mm s $^{-1}$ ) | $\Delta$ (mm s $^{-1}$ ) | $\Gamma$ (mm s $^{-1}$ ) |
|---------|---------|--------------------------|--------------------------|--------------------------|
| 300     | 100     | 0.00 $\pm$ 0.00          | 0.01 $\pm$ 18.65         | 1.23 $\pm$ 0.02          |
| 280     | 100     | 0.02 $\pm$ 0.00          | 0.00 $\pm$ 17.37         | 1.20 $\pm$ 0.02          |
| 260     | 100     | 0.02 $\pm$ 0.00          | 0.00 $\pm$ 1.72          | 1.21 $\pm$ 0.02          |
| 240     | 100     | 0.04 $\pm$ 0.00          | 0.11 $\pm$ 0.07          | 1.18 $\pm$ 0.02          |
| 220     | 100     | 0.04 $\pm$ 0.00          | 0.00 $\pm$ 1.64          | 1.20 $\pm$ 0.02          |
| 200     | 100     | 0.05 $\pm$ 0.00          | 0.20 $\pm$ 0.04          | 1.18 $\pm$ 0.02          |
| 150     | 100     | 0.05 $\pm$ 0.00          | 0.16 $\pm$ 0.05          | 1.21 $\pm$ 0.02          |
| 100     | 100     | 0.00 $\pm$ 0.00          | 0.01 $\pm$ 18.65         | 1.23 $\pm$ 0.02          |
| 50      | 100     | 0.02 $\pm$ 0.00          | 0.00 $\pm$ 17.37         | 1.20 $\pm$ 0.02          |
| 20      | 100     | 0.02 $\pm$ 0.00          | 0.00 $\pm$ 1.72          | 1.21 $\pm$ 0.02          |

$A$ : absorption area,  $\delta$ : isomer shift,  $\Delta$ : quadrupole splitting,  $\Gamma$ : full width at half maximum.

**Table S5.**  $^{119}\text{Sn}$ -Mössbauer parameters of  $\text{SnO}_2$  recorded from 300 to 20 K.

| $T$ (K) | $A$ (%) | $\delta$ (mm s $^{-1}$ ) | $\Delta$ (mm s $^{-1}$ ) | $\Gamma$ (mm s $^{-1}$ ) |
|---------|---------|--------------------------|--------------------------|--------------------------|
| 300     | 100     | 0.02 $\pm$ 0.00          | 0.54 $\pm$ 0.01          | 0.96 $\pm$ 0.01          |
| 250     | 100     | 0.03 $\pm$ 0.00          | 0.54 $\pm$ 0.01          | 0.98 $\pm$ 0.01          |
| 200     | 100     | 0.05 $\pm$ 0.00          | 0.55 $\pm$ 0.01          | 0.96 $\pm$ 0.01          |
| 150     | 100     | 0.06 $\pm$ 0.00          | 0.54 $\pm$ 0.01          | 0.95 $\pm$ 0.01          |
| 100     | 100     | 0.07 $\pm$ 0.00          | 0.54 $\pm$ 0.01          | 0.95 $\pm$ 0.01          |
| 50      | 100     | 0.07 $\pm$ 0.00          | 0.53 $\pm$ 0.01          | 0.97 $\pm$ 0.01          |
| 20      | 100     | 0.08 $\pm$ 0.00          | 0.53 $\pm$ 0.01          | 0.94 $\pm$ 0.01          |

$A$ : absorption area,  $\delta$ : isomer shift,  $\Delta$ : quadrupole splitting,  $\Gamma$ : full width at half maximum.

**Table S6.**  $^{119}\text{Sn}$ -Mössbauer parameters of  $\text{SnO}$  recorded from 300 to 20 K.

| $T$ (K) | $A$ (%) | $\delta$ (mm s $^{-1}$ ) | $\Delta$ (mm s $^{-1}$ ) | $\Gamma$ (mm s $^{-1}$ ) |
|---------|---------|--------------------------|--------------------------|--------------------------|
| 300     | 94.8    | 2.79 $\pm$ 0.01          | 1.39 $\pm$ 0.01          | 0.88 $\pm$ 0.01          |
|         | 5.2     | 3.22 $\pm$ 0.03          | 0.00 $\pm$ 2             | 0.60 $\pm$ 0.40          |
| 250     | 95.1    | 2.80 $\pm$ 0.01          | 1.39 $\pm$ 0.01          | 0.91 $\pm$ 0.01          |
|         | 4.9     | 3.28 $\pm$ 0.03          | 0.22 $\pm$ 0.07          | 0.50 $\pm$ 0.10          |
| 200     | 94.9    | 2.82 $\pm$ 0.01          | 1.39 $\pm$ 0.01          | 0.92 $\pm$ 0.01          |
|         | 5.1     | 3.27 $\pm$ 0.03          | 0.00 $\pm$ 10            | 0.60 $\pm$ 0.30          |
| 150     | 96.8    | 2.84 $\pm$ 0.01          | 1.39 $\pm$ 0.01          | 0.97 $\pm$ 0.01          |
|         | 3.2     | 3.31 $\pm$ 0.02          | 0.10 $\pm$ 0.10          | 0.40 $\pm$ 0.10          |
| 100     | 97.2    | 2.84 $\pm$ 0.01          | 1.40 $\pm$ 0.01          | 1.01 $\pm$ 0.01          |
|         | 2.8     | 3.27 $\pm$ 0.02          | 0.24 $\pm$ 0.03          | 0.38 $\pm$ 0.07          |
| 50      | 97.0    | 2.85 $\pm$ 0.01          | 1.41 $\pm$ 0.01          | 1.06 $\pm$ 0.01          |
|         | 3.0     | 3.31 $\pm$ 0.02          | 0.00 $\pm$ 10            | 0.60 $\pm$ 0.30          |
| 20      | 100     | 2.85 $\pm$ 0.01          | 1.38 $\pm$ 0.01          | 1.09 $\pm$ 0.01          |

$A$ : absorption area,  $\delta$ : isomer shift,  $\Delta$ : quadrupole splitting,  $\Gamma$ : full width at half maximum.



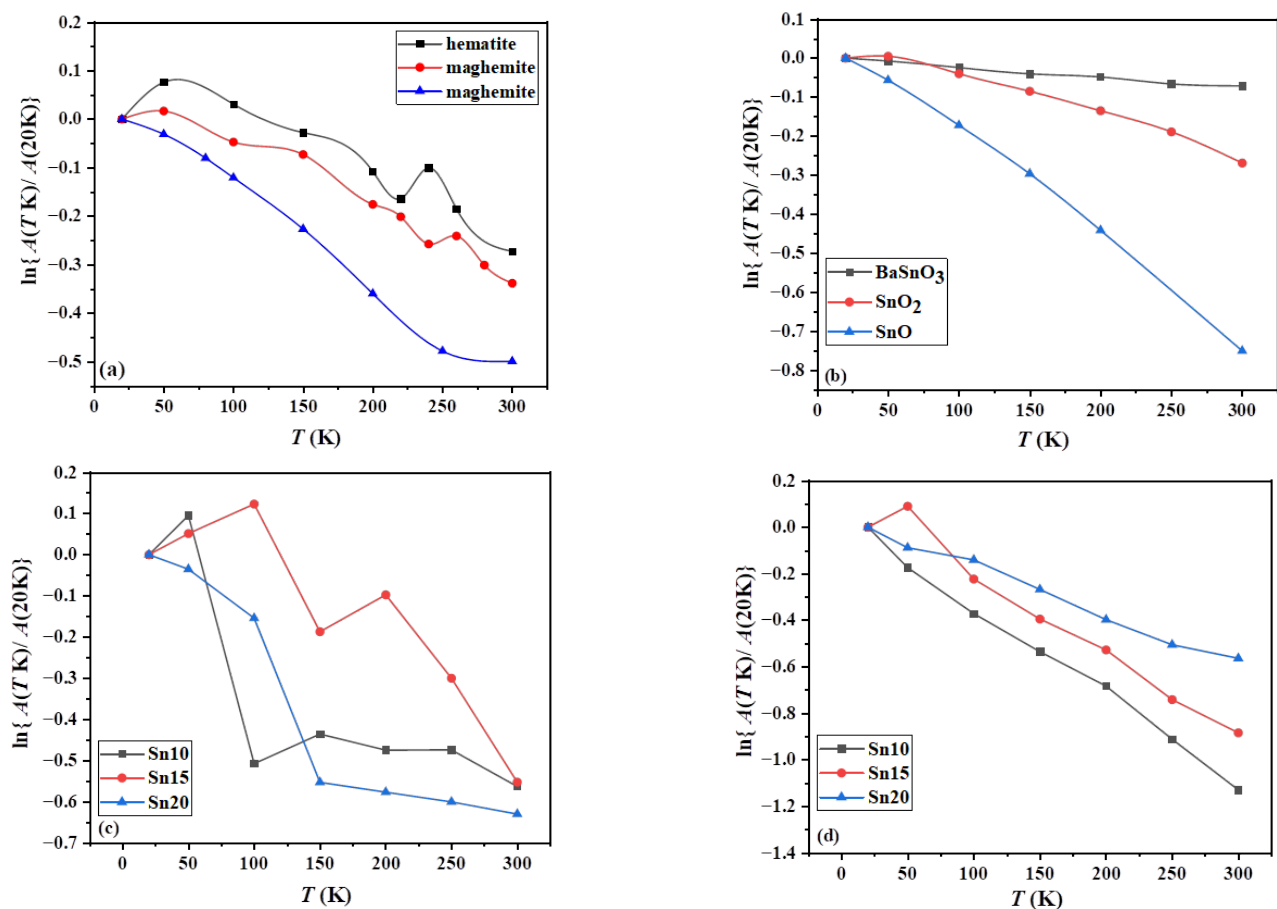

**Figure S5.** The temperature dependence of the normalized absorption area for iron oxide, tin compounds and  $\alpha$ -Sn<sub>x</sub>Fe<sub>1-x</sub>OOH NPs derived from the <sup>57</sup>Fe- and <sup>119</sup>Sn-Mössbauer spectra of  $\alpha$ -Sn<sub>x</sub>Fe<sub>1-x</sub>OOH NPs with 'x' of 0.10, 0.15 and 0.20 measured at 300, 250, 200, 150, 100, 50, 20 K.
